# Supplementary material
Source: Springer Nature journal article supplement (https://www.springermedizin.de/resource/supplementary/10194_2013_572_MOESM1_ESM.pdf/9422710)

**A**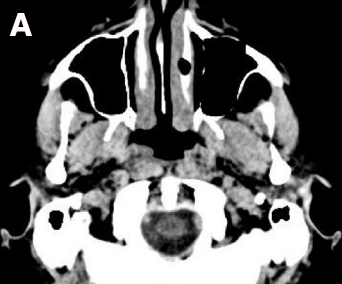**B**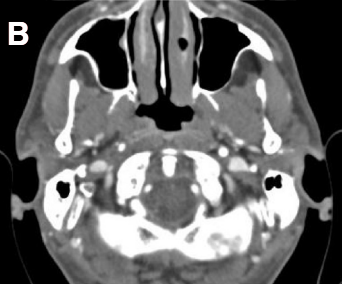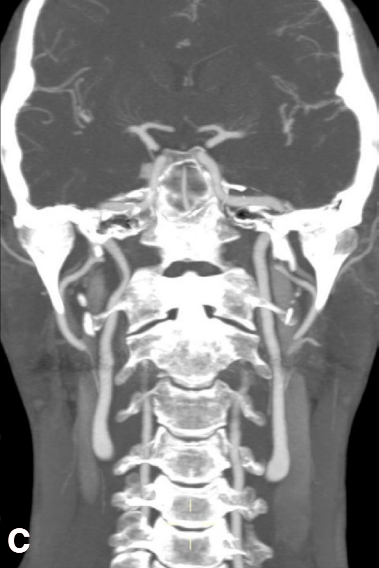**C**

Supplement: MOESM1 [file 9422710]
